# Supplementary material for: Health care professionals from developing countries report educational benefits after an online diabetes course
Source: PubMed Central journal article supplement (PMC5452380; doi:10.1186/s12909-017-0935-y), 2017-05-31
Supplement: 12909_2017_935_MOESM2_ESM.pdf [file 12909_2017_935_MOESM2_ESM.pdf]

## **Legends for Supplementary Data 1**

The appendix shows the questionnaire used for the survey and consist of 9 question. The survey was distributed to learners of the Cousera based MOOC course: Diabetes a Global Challenge.

## Diabetes - a Global Challenge

Welcome to our survey!

**Please complete this survey to provide us with valuable feedback regarding the course Diabetes - a Global Challenge.**

**Thank you!**

## Diabetes - a Global Challenge

\* 1. Your gender?

\* 2. Your age?

\* 3. Which course(s) did you attend?

Spring 2014

Fall 2014

Spring 2015

\* 4. Did you complete the course(s)?

- Yes
- No
- Some

\* 5. Where do you live?

\* 6. Primary interest in diabetes?

\* 7. What best describes your highest level of education?

\* 8. Primary occupation?

\* 9. How do you agree in the following statements?

|                                                                            | Strongly agree        | Agree                 | Disagree              | Strongly disagree     | Neither agree nor disagree |
|----------------------------------------------------------------------------|-----------------------|-----------------------|-----------------------|-----------------------|----------------------------|
| The course has been an useful learning experience                          | <input type="radio"/> | <input type="radio"/> | <input type="radio"/> | <input type="radio"/> | <input type="radio"/>      |
| I have learned something I can use in my professional life                 | <input type="radio"/> | <input type="radio"/> | <input type="radio"/> | <input type="radio"/> | <input type="radio"/>      |
| I have enhanced my skills for current job                                  | <input type="radio"/> | <input type="radio"/> | <input type="radio"/> | <input type="radio"/> | <input type="radio"/>      |
| I am now better qualified to apply for new jobs                            | <input type="radio"/> | <input type="radio"/> | <input type="radio"/> | <input type="radio"/> | <input type="radio"/>      |
| The course has had influence on finding a new job/starting my own business | <input type="radio"/> | <input type="radio"/> | <input type="radio"/> | <input type="radio"/> | <input type="radio"/>      |
| The course has had influence on me getting a pay increase or promotion     | <input type="radio"/> | <input type="radio"/> | <input type="radio"/> | <input type="radio"/> | <input type="radio"/>      |
| I have advanced my career through this course                              | <input type="radio"/> | <input type="radio"/> | <input type="radio"/> | <input type="radio"/> | <input type="radio"/>      |

|                                                                                            | Strongly agree        | Agree                 | Disagree              | Strongly disagree     | Neither agree nor disagree |
|--------------------------------------------------------------------------------------------|-----------------------|-----------------------|-----------------------|-----------------------|----------------------------|
| I have increased my professional network                                                   | <input type="radio"/> | <input type="radio"/> | <input type="radio"/> | <input type="radio"/> | <input type="radio"/>      |
| I have gained knowledge for my field of study or work                                      | <input type="radio"/> | <input type="radio"/> | <input type="radio"/> | <input type="radio"/> | <input type="radio"/>      |
| I have collaborated with other students / used discussion forums and Facebook              | <input type="radio"/> | <input type="radio"/> | <input type="radio"/> | <input type="radio"/> | <input type="radio"/>      |
| I have had educational benefit(s)                                                          | <input type="radio"/> | <input type="radio"/> | <input type="radio"/> | <input type="radio"/> | <input type="radio"/>      |
| The course has contributed to gaining credits or prerequisites for academic degree/program | <input type="radio"/> | <input type="radio"/> | <input type="radio"/> | <input type="radio"/> | <input type="radio"/>      |
| The course helped me decide what to study                                                  | <input type="radio"/> | <input type="radio"/> | <input type="radio"/> | <input type="radio"/> | <input type="radio"/>      |
| I have considered applying to University of Copenhagen                                     | <input type="radio"/> | <input type="radio"/> | <input type="radio"/> | <input type="radio"/> | <input type="radio"/>      |
| I would recommend this course to friends and colleagues                                    | <input type="radio"/> | <input type="radio"/> | <input type="radio"/> | <input type="radio"/> | <input type="radio"/>      |

**Thank you for your participation!**
